# Supplementary material for: Aerolysin nanopore-based identification of proteinogenic amino acids using a bipolar peptide probe
Source: Royal Society of Chemistry journal article supplement (doi:10.1039/d2na00190j), 2022-01-01
Supplement: d2na00190j1.pdf [file d2na00190j1.pdf]

*Electronic Supplementary Information*

# **Aerolysin Nanopore-Based Identification of Proteinogenic Amino Acids Using a Bipolar Peptide Probe**

Yaxian Ge <sup>a</sup>, Mengjie Cui <sup>a</sup>, Qiuqi Zhang <sup>b</sup>, Ying Wang <sup>a,\*</sup> and Dongmei Xi <sup>a,\*</sup>

<sup>a</sup> Shandong Provincial Key Laboratory of Detection Technology for Tumor Markers, College of Life Science, Linyi University, Linyi 276005, P. R. China

<sup>b</sup> The First School of Clinical Medicine, Southern Medical University, Guangzhou 510515, P. R. China

\* Correspondence author:

dongmxi@126.com (Prof. Dr. Dongmei Xi)

wangying@lyu.edu.cn (Prof. Dr. Ying Wang)

## Electronic Supplementary Information

**Table S1.** Sequences and properties of the peptides used in this work.

**Figure S1.** Comparison of the blocking current, blocking duration, and characteristic signals of bipolar probes of different lengths.

**Figure S2.** Duration time vs applied voltage for the bipolar probes W and H.

**Figure S3.**  $I/I_0$  distribution of 20 amino acids.

**Figure S4.** Dependence of the blocking current on the volume of amino acid X.

**Table S1.** Sequences and properties of the peptides used in this work.

| Name | Sequence (N'→C') | Mw (Da) | Net charge (pH=7.5) | Manufacturer |
|------|------------------|---------|---------------------|--------------|
| A    | DDDDARRRRR       | 1330.36 | 1.0                 | GL Biochem   |
| L    | DDDDLRRRRR       | 1372.44 | 1.0                 | GL Biochem   |
| D    | DDDDDRRRRR       | 1374.37 | 0.0                 | GL Biochem   |
| E    | DDDDERRRRR       | 1388.40 | 0.0                 | GL Biochem   |
| F    | DDDDFRRRRR       | 1406.46 | 1.0                 | GL Biochem   |
| G    | DDDDGRRRRR       | 1316.34 | 1.0                 | GL Biochem   |
| H    | DDDDHRRRRR       | 1396.42 | 1.0                 | GL Biochem   |
| I    | DDDDIRRRRR       | 1372.44 | 1.0                 | GL Biochem   |
| M    | DDDDMRRRRR       | 1390.48 | 1.0                 | GL Biochem   |
| C    | DDDDCRRRRR       | 1362.43 | 1.0                 | GL Biochem   |
| N    | DDDDNRRRRR       | 1373.39 | 1.0                 | GL Biochem   |
| T    | DDDDTRRRRR       | 1360.39 | 1.0                 | GL Biochem   |
| P    | DDDDPRRRRR       | 1356.40 | 1.0                 | GL Biochem   |
| Q    | DDDDQRRRRR       | 1387.41 | 1.0                 | GL Biochem   |
| Y    | DDDDYRRRRR       | 1422.46 | 1.0                 | GL Biochem   |
| S    | DDDDSRRRRR       | 1346.36 | 1.0                 | GL Biochem   |
| V    | DDDDVRRRRR       | 1358.42 | 1.0                 | GL Biochem   |
| W    | DDDDWRRRRR       | 1445.5  | 1.0                 | GL Biochem   |
| K    | DDDDKRRRRR       | 1387.46 | 2.0                 | GL Biochem   |
| R    | DDDDRRRRRR       | 1415.47 | 2.0                 | GL Biochem   |
| G-   | DDDDDDGRRRRR     | 1546.51 | -1.0                | GL Biochem   |
| F-   | DDDDDDFRRRRR     | 1636.63 | -1.0                | GL Biochem   |
| P-   | DDDDDDPRRRRR     | 1586.57 | -1.0                | GL Biochem   |
| I-   | DDDDDDIRRRRR     | 1602.62 | -1.0                | GL Biochem   |
| Q-   | DDDDDDQRRRRR     | 1617.59 | -1.0                | GL Biochem   |
| A6   | DDDDDDARRRRRRR   | 2029.09 | 2.0                 | GL Biochem   |

|                                                                                                                                                                                         |                           |         |      |            |
|-----------------------------------------------------------------------------------------------------------------------------------------------------------------------------------------|---------------------------|---------|------|------------|
| C6                                                                                                                                                                                      | DDDDDDDCRRRRRRRR          | 2061.16 | 1.9  | GL Biochem |
| S6                                                                                                                                                                                      | DDDDDDDSRRRRRRRR          | 2045.09 | 2.0  | GL Biochem |
| A8                                                                                                                                                                                      | DDDDDDDDAARRRRRR<br>RRRR  | 2571.63 | 2.0  | GL Biochem |
| C8                                                                                                                                                                                      | DDDDDDDDDCRRRRRR<br>RRRR  | 2603.70 | 1.9  | GL Biochem |
| S8                                                                                                                                                                                      | DDDDDDDDDSRRRRRR<br>RRRRR | 2587.63 | 2..0 | GL Biochem |
| *The net charge of examined peptides was calculated from<br><a href="http://www.novopro.cn/tools/calc_peptide_property.html">http://www.novopro.cn/tools/calc_peptide_property.html</a> |                           |         |      |            |

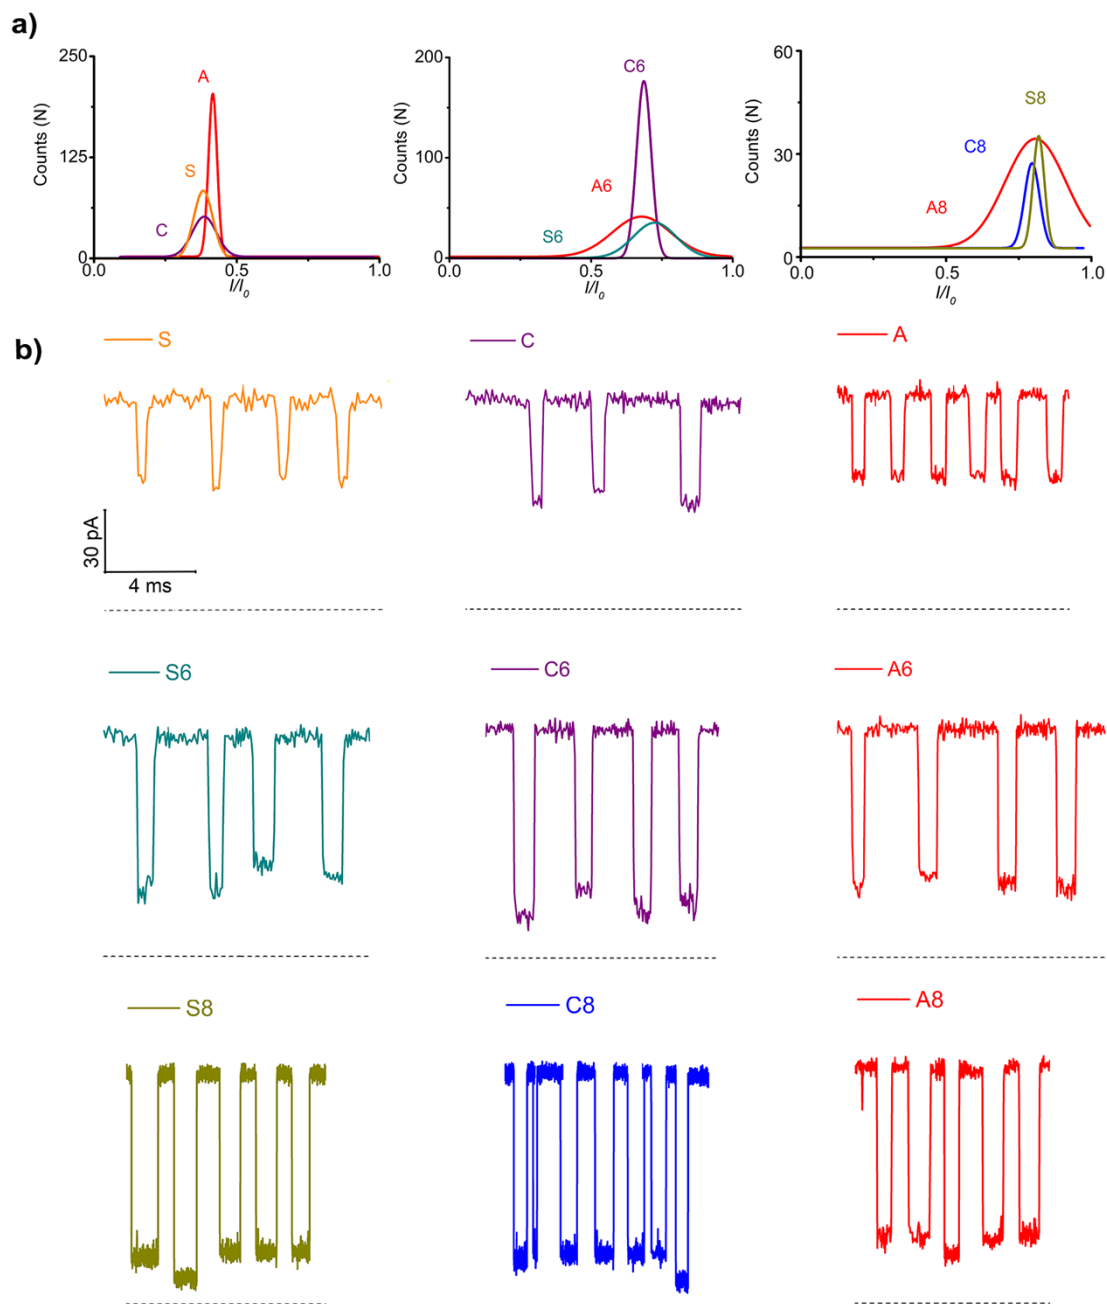

**Figure S1.** Comparison of the blocking current, blocking duration, and characteristic signals of bipolar probes of different lengths. **(a)** Comparison of blocking currents of three amino acids A, C, and S in different peptide-chain carriers. (Left, short peptide probe ( $D_4XR_5$ ), middle, intermediate peptide probe ( $D_6XR_8$ ), right, long peptide probe ( $D_8XR_{10}$ )). **(b)** Characteristic signals of peptide-chain carriers of  $D_4XR_5$ ,  $D_6XR_8$ , and  $D_8XR_{10}$ .

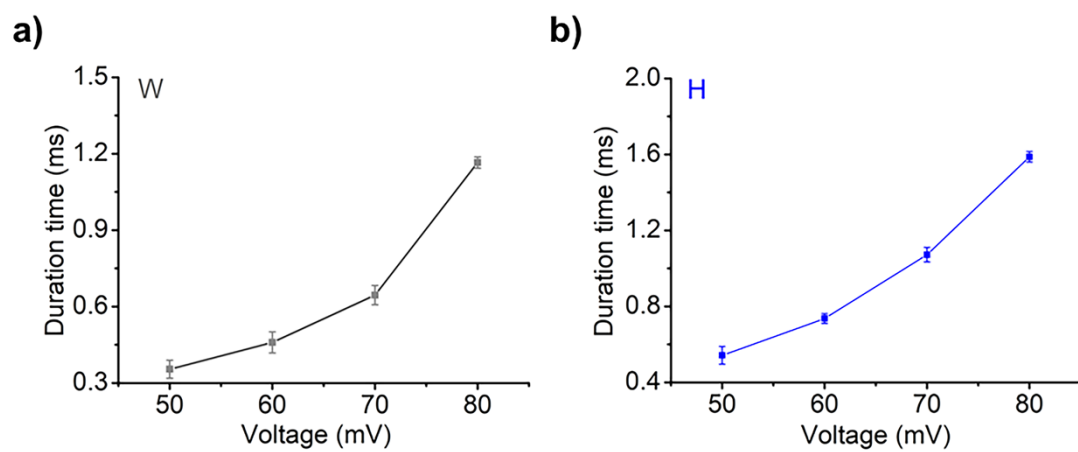

**Figure S2.** Duration time vs applied voltage for the bipolar probes W and H.

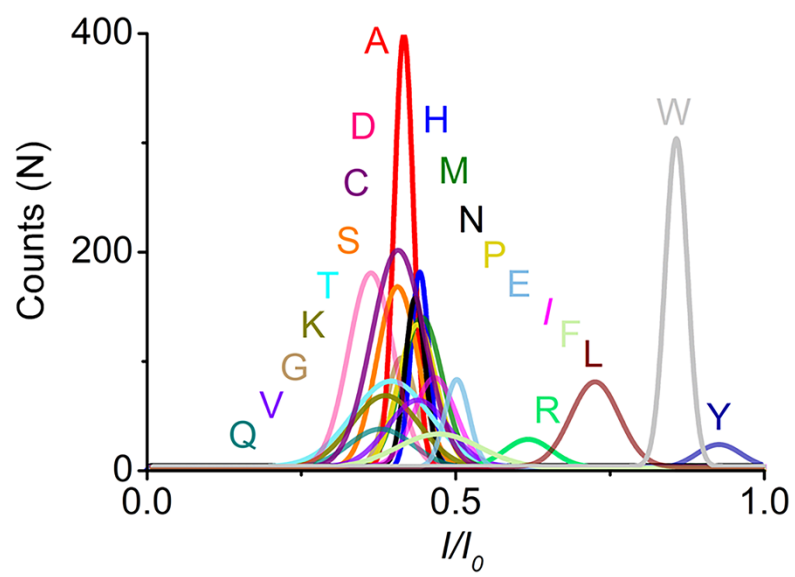

**Figure S3.**  $I/I_0$  distribution of 20 proteinogenic amino acids.

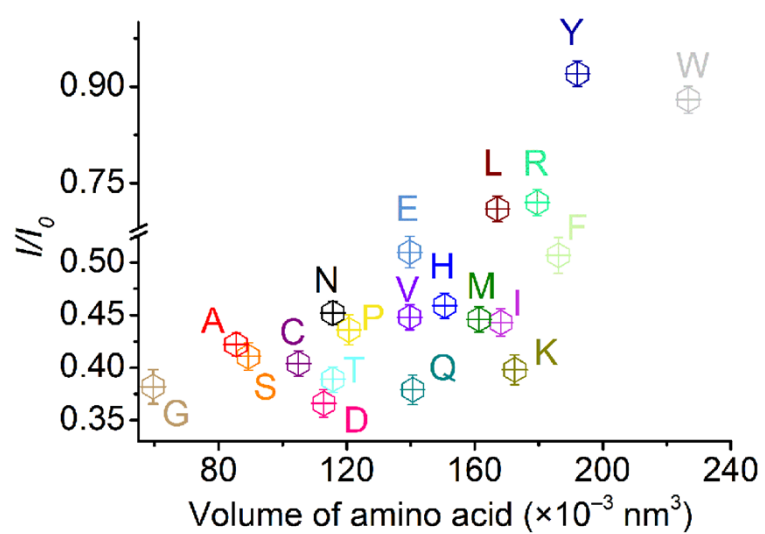

**Figure S4.** Dependence of the blocking current on the volume of amino acid X.
